# Supplementary material for: Fruit Fly Larval Survival in Picked and Unpicked Tomato Fruit of Differing Ripeness and Associated Gene Expression Patterns
Source: MDPI journal article supplement (doi:10.3390/insects13050451), 2022-05-10
Supplement: s1 [file s1]

**Supplementary Table S1:** Three-Way Analysis of variance results for the analysis of *Bactrocera tryoni* larval survival in tomato fruit of two ripening stages (colour-break and fully-ripe), two cultivars (Roma and Cherry) and two picking states (picked or unpicked). Separate ANOVAs are presented for fruit which was destructively sampled 48 and 120 hours after larval inoculation.

| <b>Treatment/interaction</b>       | <b>df</b>    | <b>F</b>     | <b>P</b>        |
|------------------------------------|--------------|--------------|-----------------|
| <b>48 hours after inoculation</b>  |              |              |                 |
| Ripening stage                     | <b>1, 72</b> | <b>7.73</b>  | <b>&lt;0.01</b> |
| Cultivar                           | 1, 72        | 1.82         | 0.182           |
| Picking status                     | 1, 72        | 1.82         | 0.182           |
| Ripening * Cultivar                | 1, 72        | 2.19         | 0.142           |
| Ripening * Picking status          | 1, 72        | 2.50         | 0.117           |
| Cultivar * Picking status          | 1, 72        | 0.77         | 0.380           |
| Ripening * Cultivar * Picking s.   | 1, 72        | 0.08         | 0.778           |
| <b>120 hours after inoculation</b> |              |              |                 |
| Ripening stage                     | 1, 72        | 0.12         | 0.915           |
| Cultivar                           | 1, 72        | 0.56         | 0.453           |
| Picking status                     | <b>1, 72</b> | <b>10.21</b> | <b>&lt;0.01</b> |
| Ripening * Cultivar                | 1, 72        | 0.007        | 0.933           |
| Ripening * Picking status          | <b>1, 72</b> | <b>3.99</b>  | <b>0.049</b>    |
| Cultivar * Picking status          | 1, 72        | 0.26         | 0.608           |
| Ripening * Cultivar * Picking s.   | 1, 72        | 0.47         | 0.495           |
